# Supplementary material
Source: Springer Nature journal article supplement (https://www.springermedizin.de/resource/supplementary/12877_2011_744_MOESM3_ESM.pdf/9440242)
Supplement: MOESM3 [file 9440242]

**Total study sample**

N=203 patients

**Inter-rater reliability**

N=21 SDAT interviews

Judge 1  
scoring

Judge 2  
scoring

**Intra-rater reliability**

N=4 SDAT  
interviews  
videotaped

N=4 SDAT  
interviews  
videotaped

Judge 1 scoring

Judge 2 scoring

Judge 3 scoring

3 months

Judge 1 scoring

Judge 2 scoring

Judge 3 scoring

*Samples used for  
SDAT reliability  
assessment*
